# Supplementary material for: MBSTAR: multiple instance learning for predicting specific functional binding sites in microRNA targets
Source: Springer Nature journal article supplement (doi:10.1038/srep08004), 2015-01-23
Supplement: 41598_2015_BFsrep08004_MOESM1_ESM.pdf [file 41598_2015_BFsrep08004_MOESM1_ESM.pdf]

# Supplementary materials for MBSTAR : multiple instance learning for predicting specific functional binding sites in microRNA targets

Sanghamitra Bandyopadhyay<sup>1,\*</sup>, Dip Ghosh<sup>1</sup>, Ramkrishna Mitra<sup>2</sup>, Zhongming Zhao<sup>2,3,4,5,\*</sup>

1 Machine Intelligence Unit, Indian Statistical Institute, Kolkata, India

2 Department of Biomedical Informatics, Vanderbilt University, Nashville, Tennessee, 37232, USA

3 Department of Cancer Biology, Vanderbilt University, Nashville, Tennessee, 37232, USA

4 Department of Psychiatry, Vanderbilt University, Nashville, Tennessee, 37232, USA

5 Center for Quantitative Sciences, Vanderbilt University, Nashville, Tennessee, 37232, USA

\* Email Address:

SB: [sanghami@isical.ac.in](mailto:sanghami@isical.ac.in)

ZZ: [zhongming.zhao@vanderbilt.edu](mailto:zhongming.zhao@vanderbilt.edu)

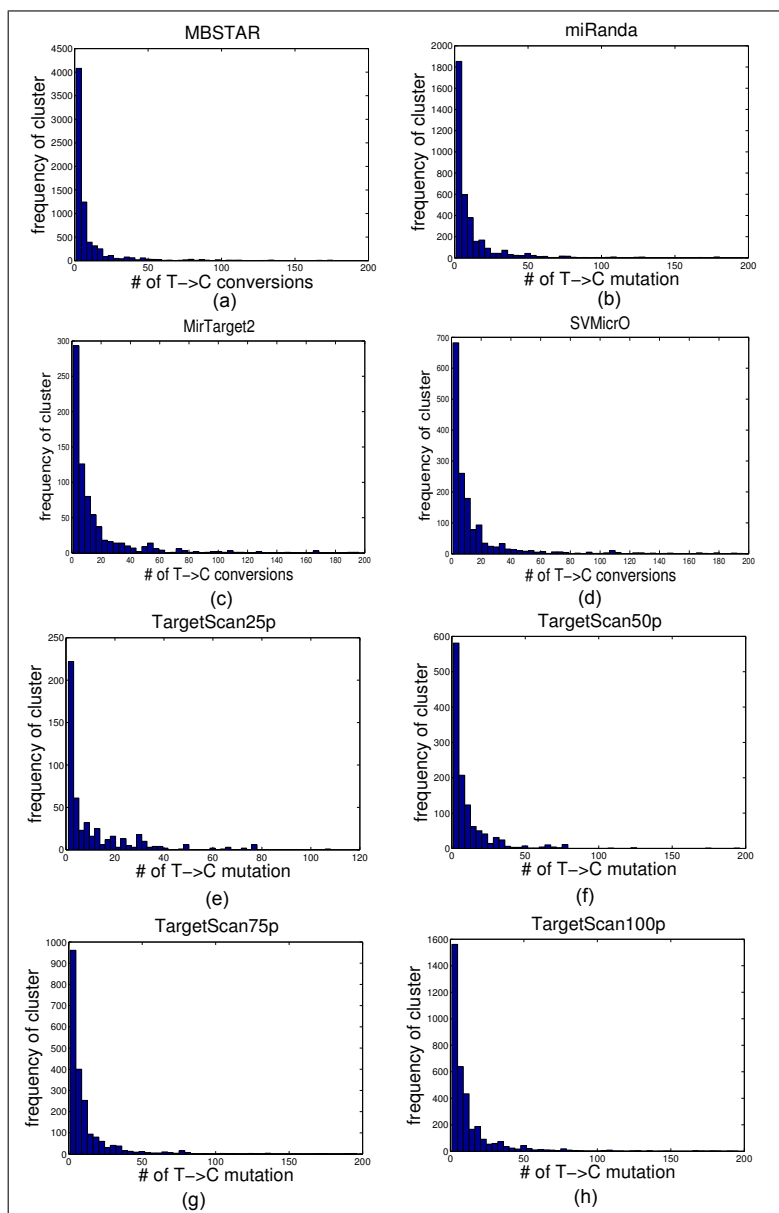

**Figure S1.** Distribution of predicted PAR-CLIP gold standard clusters according to (a) Number of T→C conversion by MBSTAR, (b) Number of T→C conversion by miRanda, (c) Number of T→C conversion by MirTarget2, (d) Number of T→C conversion by SVMicrO, (e) Number of T→C conversion by TargetScan25p, (f) Number of T→C conversion by TargetScan50p, (g) Number of T→C conversion by TargetScan75p and (h) Number of T→C conversion by TargetScan100p.

## Supplementary Methods

Here we describe that random guessing test to prove the superiority of MBSTAR. First all PBSs are extracted from 9531 validated miRNA-mRNA pairs using only seed site complementarity. We then randomly selected 1000 of such seed sites and test that how many of them overlap with PAR-CLIP clusters. We then randomly select 1000 of MBSTAR predicted FBSs and calculate the number of overlapped clusters with the same PAR-CLIP data set. This experiment is carried out 10,000 time and found that, for only 219 cases, random PBSs have more overlapping than predicted FBSs. So we conclude that MBSTAR can outperform the random approach with p-value less than 0.0219.

**Table S1** Feature ranking based on Laplacian score derived from Laplacian score based feature selection method

| <b>Feature Index</b> | <b>Feature Description</b>                       | <b>1– Laplacian Score</b> |
|----------------------|--------------------------------------------------|---------------------------|
| 3                    | Frequency of Nucleobase t in flanking site       | 0.915561414               |
| 363                  | maximum size of Interior Loop                    | 0.898200106               |
| 2                    | Frequency of Nucleobase g in flanking site       | 0.893687327               |
| 4                    | Frequency of Nucleobase c in flanking site       | 0.893000146               |
| 1                    | Frequency of Nucleobase a in flanking site       | 0.887377625               |
| 341                  | MFE of RNA pair                                  | 0.880487537               |
| 15                   | Frequency of Nucleobase tt in flanking site      | 0.876769377               |
| 353                  | maximum size of Hairpin                          | 0.865627287               |
| 5                    | Frequency of Nucleobase aa in flanking site      | 0.834235876               |
| 20                   | Frequency of Nucleobase cc in flanking site      | 0.830898806               |
| 10                   | Frequency of Nucleobase gg in flanking site      | 0.829856343               |
| 63                   | Frequency of Nucleobase ttt in flanking site     | 0.821761825               |
| 343                  | maximum size of Bulge                            | 0.759142476               |
| 13                   | Frequency of Nucleobase at in flanking site      | 0.758825637               |
| 21                   | Frequency of Nucleobase aaa in flanking site     | 0.757034553               |
| 7                    | Frequency of Nucleobase ta in flanking site      | 0.739103589               |
| 255                  | Frequency of Nucleobase tttt in flanking site    | 0.725381025               |
| 42                   | Frequency of Nucleobase ggg in flanking site     | 0.710959477               |
| 12                   | Frequency of Nucleobase cg in flanking site      | 0.70295739                |
| 84                   | Frequency of Nucleobase ccc in flanking site     | 0.689674175               |
| 351                  | number of bulge with length 8 or greater         | 0.682303144               |
| 6                    | Frequency of Nucleobase ga in flanking site      | 0.665999366               |
| 19                   | Frequency of Nucleobase tc in flanking site      | 0.664192939               |
| 85                   | Frequency of Nucleobase aaaa in flanking site    | 0.644962661               |
| 9                    | Frequency of Nucleobase ag in flanking site      | 0.641590576               |
| 371                  | number of Interior loop with length 8 or greater | 0.638535463               |
| 61                   | Frequency of Nucleobase att in flanking site     | 0.619012514               |
| 52                   | Frequency of Nucleobase ccg in flanking site     | 0.615575007               |
| 11                   | Frequency of Nucleobase tg in flanking site      | 0.613252133               |
| 14                   | Frequency of Nucleobase gt in flanking site      | 0.613241796               |
| 16                   | Frequency of Nucleobase ct in flanking site      | 0.604236154               |
| 17                   | Frequency of Nucleobase ac in flanking site      | 0.603085662               |
| 55                   | Frequency of Nucleobase tat in flanking site     | 0.602498918               |
| 44                   | Frequency of Nucleobase cgg in flanking site     | 0.594021664               |
| 31                   | Frequency of Nucleobase tta in flanking site     | 0.589109348               |
| 83                   | Frequency of Nucleobase tcc in flanking site     | 0.577646247               |

*Continued on next page*

Table 1 – *Continued from previous page*

| <b>Feature Index</b> | <b>Feature Description</b>                    | <b>1– Laplacian Score</b> |
|----------------------|-----------------------------------------------|---------------------------|
| 26                   | Frequency of Nucleobase gga in flanking site  | 0.567375701               |
| 23                   | Frequency of Nucleobase taa in flanking site  | 0.560677186               |
| 53                   | Frequency of Nucleobase aat in flanking site  | 0.557663507               |
| 8                    | Frequency of Nucleobase ca in flanking site   | 0.539738844               |
| 38                   | Frequency of Nucleobase gag in flanking site  | 0.531748313               |
| 59                   | Frequency of Nucleobase tgt in flanking site  | 0.531501302               |
| 253                  | Frequency of Nucleobase attt in flanking site | 0.526975171               |
| 29                   | Frequency of Nucleobase ata in flanking site  | 0.526292668               |
| 127                  | Frequency of Nucleobase ttta in flanking site | 0.523095294               |
| 41                   | Frequency of Nucleobase agg in flanking site  | 0.513393093               |
| 70                   | Frequency of Nucleobase gac in flanking site  | 0.510832228               |
| 18                   | Frequency of Nucleobase gc in flanking site   | 0.506982195               |
| 81                   | Frequency of Nucleobase acc in flanking site  | 0.501339427               |
| 80                   | Frequency of Nucleobase ctc in flanking site  | 0.501213518               |
| 172                  | Frequency of Nucleobase cggg in flanking site | 0.498602254               |
| 37                   | Frequency of Nucleobase aag in flanking site  | 0.496192827               |
| 212                  | Frequency of Nucleobase cccg in flanking site | 0.485067566               |
| 68                   | Frequency of Nucleobase cct in flanking site  | 0.484401333               |
| 340                  | Frequency of Nucleobase cccc in flanking site | 0.484164215               |
| 361                  | number of Hairpin with length 8 or greater    | 0.478485471               |
| 213                  | Frequency of Nucleobase aaat in flanking site | 0.478415283               |
| 58                   | Frequency of Nucleobase ggt in flanking site  | 0.477733019               |
| 46                   | Frequency of Nucleobase gtg in flanking site  | 0.475983857               |
| 67                   | Frequency of Nucleobase tct in flanking site  | 0.474215388               |
| 170                  | Frequency of Nucleobase gggg in flanking site | 0.473449632               |
| 339                  | Frequency of Nucleobase tccc in flanking site | 0.467316041               |
| 82                   | Frequency of Nucleobase gcc in flanking site  | 0.459745934               |
| 223                  | Frequency of Nucleobase ttat in flanking site | 0.451717443               |
| 78                   | Frequency of Nucleobase gtc in flanking site  | 0.451621103               |
| 25                   | Frequency of Nucleobase aga in flanking site  | 0.451072015               |
| 64                   | Frequency of Nucleobase ctt in flanking site  | 0.449470288               |
| 79                   | Frequency of Nucleobase ttc in flanking site  | 0.448432561               |
| 36                   | Frequency of Nucleobase cca in flanking site  | 0.438928779               |
| 276                  | Frequency of Nucleobase ccct in flanking site | 0.43868072                |
| 234                  | Frequency of Nucleobase gggt in flanking site | 0.438434383               |
| 180                  | Frequency of Nucleobase ccgg in flanking site | 0.436700677               |
| 247                  | Frequency of Nucleobase tatt in flanking site | 0.435310952               |
| 62                   | Frequency of Nucleobase gtt in flanking site  | 0.433858046               |

*Continued on next page*

Table 1 – *Continued from previous page*

| <b>Feature Index</b> | <b>Feature Description</b>                    | <b>1– Laplacian Score</b> |
|----------------------|-----------------------------------------------|---------------------------|
| 106                  | Frequency of Nucleobase ggga in flanking site | 0.432623855               |
| 47                   | Frequency of Nucleobase ttg in flanking site  | 0.431227982               |
| 87                   | Frequency of Nucleobase taaa in flanking site | 0.431000278               |
| 72                   | Frequency of Nucleobase cac in flanking site  | 0.428639998               |
| 33                   | Frequency of Nucleobase aca in flanking site  | 0.426705292               |
| 22                   | Frequency of Nucleobase gaa in flanking site  | 0.426029529               |
| 28                   | Frequency of Nucleobase cga in flanking site  | 0.418504685               |
| 154                  | Frequency of Nucleobase ggag in flanking site | 0.417844891               |
| 245                  | Frequency of Nucleobase aatt in flanking site | 0.415687455               |
| 282                  | Frequency of Nucleobase ggac in flanking site | 0.406929734               |
| 336                  | Frequency of Nucleobase ctcc in flanking site | 0.401443411               |
| 324                  | Frequency of Nucleobase cctc in flanking site | 0.397883898               |
| 166                  | Frequency of Nucleobase gagg in flanking site | 0.397734672               |
| 326                  | Frequency of Nucleobase gacc in flanking site | 0.395349065               |
| 74                   | Frequency of Nucleobase ggc in flanking site  | 0.395107569               |
| 292                  | Frequency of Nucleobase ccac in flanking site | 0.393046702               |
| 51                   | Frequency of Nucleobase tcg in flanking site  | 0.392949051               |
| 169                  | Frequency of Nucleobase aggg in flanking site | 0.38926036                |
| 362                  | number of Interior Loop                       | 0.388808638               |
| 24                   | Frequency of Nucleobase caa in flanking site  | 0.386005791               |
| 330                  | Frequency of Nucleobase ggcc in flanking site | 0.385176554               |
| 49                   | Frequency of Nucleobase acg in flanking site  | 0.382741065               |
| 93                   | Frequency of Nucleobase ataa in flanking site | 0.379044653               |
| 319                  | Frequency of Nucleobase ttcc in flanking site | 0.37733167                |
| 60                   | Frequency of Nucleobase cgt in flanking site  | 0.376830617               |
| 45                   | Frequency of Nucleobase atg in flanking site  | 0.375840934               |
| 149                  | Frequency of Nucleobase aaag in flanking site | 0.374169828               |
| 239                  | Frequency of Nucleobase ttgt in flanking site | 0.372094503               |
| 256                  | Frequency of Nucleobase cttt in flanking site | 0.369306634               |
| 221                  | Frequency of Nucleobase atat in flanking site | 0.369078771               |
| 76                   | Frequency of Nucleobase cgc in flanking site  | 0.368044705               |
| 238                  | Frequency of Nucleobase gtgt in flanking site | 0.367175494               |
| 352                  | number of Hairpin                             | 0.364155665               |
| 43                   | Frequency of Nucleobase tgg in flanking site  | 0.361984266               |
| 69                   | Frequency of Nucleobase aac in flanking site  | 0.360236195               |
| 101                  | Frequency of Nucleobase aaga in flanking site | 0.358324472               |
| 271                  | Frequency of Nucleobase ttct in flanking site | 0.358291276               |
| 30                   | Frequency of Nucleobase gta in flanking site  | 0.358070462               |

*Continued on next page*

Table 1 – *Continued from previous page*

| <b>Feature Index</b> | <b>Feature Description</b>                    | <b>1– Laplacian Score</b> |
|----------------------|-----------------------------------------------|---------------------------|
| 191                  | Frequency of Nucleobase tttg in flanking site | 0.356059473               |
| 119                  | Frequency of Nucleobase tata in flanking site | 0.35581505                |
| 334                  | Frequency of Nucleobase gtcc in flanking site | 0.355438539               |
| 198                  | Frequency of Nucleobase gacg in flanking site | 0.355028267               |
| 314                  | Frequency of Nucleobase ggtc in flanking site | 0.354717391               |
| 187                  | Frequency of Nucleobase tgtg in flanking site | 0.354335047               |
| 284                  | Frequency of Nucleobase cgac in flanking site | 0.35313783                |
| 265                  | Frequency of Nucleobase agct in flanking site | 0.352370418               |
| 88                   | Frequency of Nucleobase caaa in flanking site | 0.351851151               |
| 337                  | Frequency of Nucleobase accc in flanking site | 0.351850663               |
| 254                  | Frequency of Nucleobase gttt in flanking site | 0.351790602               |
| 86                   | Frequency of Nucleobase gaaa in flanking site | 0.351641345               |
| 338                  | Frequency of Nucleobase gccc in flanking site | 0.350235336               |
| 56                   | Frequency of Nucleobase cat in flanking site  | 0.349234924               |
| 57                   | Frequency of Nucleobase agt in flanking site  | 0.346893115               |
| 251                  | Frequency of Nucleobase tgtt in flanking site | 0.344207301               |
| 97                   | Frequency of Nucleobase acaa in flanking site | 0.343219044               |
| 117                  | Frequency of Nucleobase aata in flanking site | 0.338737902               |
| 95                   | Frequency of Nucleobase ttaa in flanking site | 0.336683681               |
| 35                   | Frequency of Nucleobase tca in flanking site  | 0.335286251               |
| 316                  | Frequency of Nucleobase cgtc in flanking site | 0.333202835               |
| 295                  | Frequency of Nucleobase tagc in flanking site | 0.328922182               |
| 323                  | Frequency of Nucleobase tctc in flanking site | 0.327565675               |
| 259                  | Frequency of Nucleobase tctt in flanking site | 0.325274796               |
| 206                  | Frequency of Nucleobase gtcg in flanking site | 0.322921181               |
| 328                  | Frequency of Nucleobase cacc in flanking site | 0.318595421               |
| 116                  | Frequency of Nucleobase ccga in flanking site | 0.318266191               |
| 148                  | Frequency of Nucleobase ccca in flanking site | 0.317167227               |
| 277                  | Frequency of Nucleobase aaac in flanking site | 0.315942353               |
| 108                  | Frequency of Nucleobase cgga in flanking site | 0.31520999                |
| 298                  | Frequency of Nucleobase gggc in flanking site | 0.314128542               |
| 150                  | Frequency of Nucleobase gaag in flanking site | 0.31293806                |
| 332                  | Frequency of Nucleobase cgcc in flanking site | 0.310172492               |
| 123                  | Frequency of Nucleobase tgta in flanking site | 0.307394972               |
| 342                  | number of bulge                               | 0.305282409               |
| 183                  | Frequency of Nucleobase tatg in flanking site | 0.30521312                |
| 40                   | Frequency of Nucleobase cag in flanking site  | 0.30374293                |
| 27                   | Frequency of Nucleobase tga in flanking site  | 0.302103065               |

*Continued on next page*

Table 1 – *Continued from previous page*

| <b>Feature Index</b> | <b>Feature Description</b>                    | <b>1– Laplacian Score</b> |
|----------------------|-----------------------------------------------|---------------------------|
| 113                  | Frequency of Nucleobase acga in flanking site | 0.300549317               |
| 71                   | Frequency of Nucleobase tac in flanking site  | 0.30045886                |
| 209                  | Frequency of Nucleobase accg in flanking site | 0.299789604               |
| 65                   | Frequency of Nucleobase act in flanking site  | 0.299751406               |
| 174                  | Frequency of Nucleobase gtgg in flanking site | 0.299361123               |
| 210                  | Frequency of Nucleobase gccg in flanking site | 0.299185544               |
| 39                   | Frequency of Nucleobase tag in flanking site  | 0.297555386               |
| 320                  | Frequency of Nucleobase cttc in flanking site | 0.297123214               |
| 89                   | Frequency of Nucleobase agaa in flanking site | 0.29708262                |
| 125                  | Frequency of Nucleobase atta in flanking site | 0.295641929               |
| 105                  | Frequency of Nucleobase agga in flanking site | 0.295217411               |
| 165                  | Frequency of Nucleobase aagg in flanking site | 0.29475192                |
| 54                   | Frequency of Nucleobase gat in flanking site  | 0.292797514               |
| 50                   | Frequency of Nucleobase gcg in flanking site  | 0.289881846               |
| 133                  | Frequency of Nucleobase aaca in flanking site | 0.289695801               |
| 237                  | Frequency of Nucleobase atgt in flanking site | 0.28809256                |
| 94                   | Frequency of Nucleobase gtaa in flanking site | 0.286449884               |
| 222                  | Frequency of Nucleobase gtat in flanking site | 0.286043764               |
| 102                  | Frequency of Nucleobase gaga in flanking site | 0.284769359               |
| 215                  | Frequency of Nucleobase taat in flanking site | 0.28266858                |
| 229                  | Frequency of Nucleobase aagt in flanking site | 0.280797772               |
| 177                  | Frequency of Nucleobase acgg in flanking site | 0.279489317               |
| 211                  | Frequency of Nucleobase tccg in flanking site | 0.279142631               |
| 145                  | Frequency of Nucleobase acca in flanking site | 0.278566066               |
| 243                  | Frequency of Nucleobase tcgt in flanking site | 0.278398018               |
| 308                  | Frequency of Nucleobase ccgc in flanking site | 0.278106917               |
| 244                  | Frequency of Nucleobase ccgt in flanking site | 0.275966417               |
| 281                  | Frequency of Nucleobase agac in flanking site | 0.273145014               |
| 260                  | Frequency of Nucleobase cctt in flanking site | 0.270413655               |
| 335                  | Frequency of Nucleobase ttcc in flanking site | 0.268897807               |
| 257                  | Frequency of Nucleobase actt in flanking site | 0.268848344               |
| 185                  | Frequency of Nucleobase agtg in flanking site | 0.268538226               |
| 120                  | Frequency of Nucleobase cata in flanking site | 0.26832259                |
| 178                  | Frequency of Nucleobase gcgg in flanking site | 0.267872504               |
| 77                   | Frequency of Nucleobase atc in flanking site  | 0.267309056               |
| 136                  | Frequency of Nucleobase caca in flanking site | 0.266395962               |
| 153                  | Frequency of Nucleobase agag in flanking site | 0.265538086               |
| 186                  | Frequency of Nucleobase ggtg in flanking site | 0.264493548               |

*Continued on next page*



Table 1 – *Continued from previous page*

| <b>Feature Index</b> | <b>Feature Description</b>                     | <b>1– Laplacian Score</b> |
|----------------------|------------------------------------------------|---------------------------|
| 250                  | Frequency of Nucleobase gggt in flanking site  | 0.263232344               |
| 130                  | Frequency of Nucleobase gcta in flanking site  | 0.262963113               |
| 139                  | Frequency of Nucleobase tgca in flanking site  | 0.262625623               |
| 270                  | Frequency of Nucleobase gtct in flanking site  | 0.262084469               |
| 233                  | Frequency of Nucleobase aggt in flanking site  | 0.261979586               |
| 115                  | Frequency of Nucleobase tcga in flanking site  | 0.261688329               |
| 73                   | Frequency of Nucleobase agc in flanking site   | 0.260749469               |
| 217                  | Frequency of Nucleobase agat in flanking site  | 0.260497146               |
| 208                  | Frequency of Nucleobase ctcg in flanking site  | 0.259778791               |
| 294                  | Frequency of Nucleobase gagc in flanking site  | 0.255048968               |
| 179                  | Frequency of Nucleobase tcgg in flanking site  | 0.25350705                |
| 272                  | Frequency of Nucleobase ctct in flanking site  | 0.253354408               |
| 143                  | Frequency of Nucleobase ttca in flanking site  | 0.252869258               |
| 171                  | Frequency of Nucleobase tggg in flanking site  | 0.252647818               |
| 168                  | Frequency of Nucleobase cagg in flanking site  | 0.252390097               |
| 230                  | Frequency of Nucleobase gagt in flanking site  | 0.249925912               |
| 204                  | Frequency of Nucleobase cgcg in flanking site  | 0.248858324               |
| 287                  | Frequency of Nucleobase ttac in flanking site  | 0.248314321               |
| 214                  | Frequency of Nucleobase gaat in flanking site  | 0.246990895               |
| 91                   | Frequency of Nucleobase tga a in flanking site | 0.246493725               |
| 289                  | Frequency of Nucleobase acac in flanking site  | 0.245559281               |
| 365                  | number of Interior Loop with length 2          | 0.243545307               |
| 32                   | Frequency of Nucleobase cta in flanking site   | 0.243427258               |
| 156                  | Frequency of Nucleobase cgag in flanking site  | 0.243263241               |
| 48                   | Frequency of Nucleobase ctg in flanking site   | 0.242688798               |
| 275                  | Frequency of Nucleobase tcct in flanking site  | 0.240779579               |
| 190                  | Frequency of Nucleobase gttg in flanking site  | 0.240752448               |
| 248                  | Frequency of Nucleobase catt in flanking site  | 0.240111792               |
| 263                  | Frequency of Nucleobase tact in flanking site  | 0.239239315               |
| 90                   | Frequency of Nucleobase ggaa in flanking site  | 0.238820203               |
| 66                   | Frequency of Nucleobase gct in flanking site   | 0.238514358               |
| 134                  | Frequency of Nucleobase gaca in flanking site  | 0.238009162               |
| 313                  | Frequency of Nucleobase agtc in flanking site  | 0.237805683               |
| 164                  | Frequency of Nucleobase ccag in flanking site  | 0.236691596               |
| 227                  | Frequency of Nucleobase tcat in flanking site  | 0.235943638               |
| 99                   | Frequency of Nucleobase tcaa in flanking site  | 0.234806139               |
| 207                  | Frequency of Nucleobase ttcg in flanking site  | 0.234585917               |
| 315                  | Frequency of Nucleobase tgtc in flanking site  | 0.234142928               |

*Continued on next page*

Table 1 – *Continued from previous page*

| <b>Feature Index</b> | <b>Feature Description</b>                    | <b>1– Laplacian Score</b> |
|----------------------|-----------------------------------------------|---------------------------|
| 98                   | Frequency of Nucleobase gcaa in flanking site | 0.232963229               |
| 159                  | Frequency of Nucleobase ttag in flanking site | 0.232783623               |
| 285                  | Frequency of Nucleobase atac in flanking site | 0.23187766                |
| 261                  | Frequency of Nucleobase aact in flanking site | 0.228202553               |
| 296                  | Frequency of Nucleobase cagc in flanking site | 0.227965063               |
| 121                  | Frequency of Nucleobase agta in flanking site | 0.22771681                |
| 131                  | Frequency of Nucleobase tcta in flanking site | 0.226558295               |
| 157                  | Frequency of Nucleobase atag in flanking site | 0.225610787               |
| 231                  | Frequency of Nucleobase tagt in flanking site | 0.225519574               |
| 188                  | Frequency of Nucleobase cgtg in flanking site | 0.225470175               |
| 100                  | Frequency of Nucleobase ccaa in flanking site | 0.224175011               |
| 75                   | Frequency of Nucleobase tgc in flanking site  | 0.223928851               |
| 141                  | Frequency of Nucleobase atca in flanking site | 0.221842483               |
| 142                  | Frequency of Nucleobase gtca in flanking site | 0.219280065               |
| 135                  | Frequency of Nucleobase taca in flanking site | 0.215569533               |
| 321                  | Frequency of Nucleobase actc in flanking site | 0.215070486               |
| 155                  | Frequency of Nucleobase tgag in flanking site | 0.214425186               |
| 228                  | Frequency of Nucleobase ccat in flanking site | 0.213407483               |
| 151                  | Frequency of Nucleobase taag in flanking site | 0.210421006               |
| 161                  | Frequency of Nucleobase acag in flanking site | 0.209305256               |
| 303                  | Frequency of Nucleobase ttgc in flanking site | 0.208958884               |
| 147                  | Frequency of Nucleobase tcca in flanking site | 0.208503371               |
| 262                  | Frequency of Nucleobase gact in flanking site | 0.208023769               |
| 109                  | Frequency of Nucleobase atga in flanking site | 0.207868394               |
| 92                   | Frequency of Nucleobase cgaa in flanking site | 0.207752445               |
| 235                  | Frequency of Nucleobase tggc in flanking site | 0.207659405               |
| 126                  | Frequency of Nucleobase gtta in flanking site | 0.206877773               |
| 246                  | Frequency of Nucleobase gatt in flanking site | 0.20597805                |
| 300                  | Frequency of Nucleobase cggc in flanking site | 0.205920581               |
| 252                  | Frequency of Nucleobase cggt in flanking site | 0.205707207               |
| 181                  | Frequency of Nucleobase aatg in flanking site | 0.204993579               |
| 225                  | Frequency of Nucleobase acat in flanking site | 0.204646703               |
| 103                  | Frequency of Nucleobase taga in flanking site | 0.20380668                |
| 196                  | Frequency of Nucleobase cctg in flanking site | 0.203627747               |
| 152                  | Frequency of Nucleobase caag in flanking site | 0.203449802               |
| 107                  | Frequency of Nucleobase tgga in flanking site | 0.203139141               |
| 163                  | Frequency of Nucleobase tcag in flanking site | 0.203135409               |
| 317                  | Frequency of Nucleobase attc in flanking site | 0.202917301               |

*Continued on next page*

Table 1 – *Continued from previous page*

| <b>Feature Index</b> | <b>Feature Description</b>                    | <b>1– Laplacian Score</b> |
|----------------------|-----------------------------------------------|---------------------------|
| 110                  | Frequency of Nucleobase gtga in flanking site | 0.202093833               |
| 197                  | Frequency of Nucleobase aacg in flanking site | 0.200472412               |
| 111                  | Frequency of Nucleobase ttga in flanking site | 0.200045171               |
| 249                  | Frequency of Nucleobase agtt in flanking site | 0.1993359                 |
| 96                   | Frequency of Nucleobase ctaa in flanking site | 0.196426912               |
| 175                  | Frequency of Nucleobase ttgg in flanking site | 0.195347118               |
| 329                  | Frequency of Nucleobase agcc in flanking site | 0.194204392               |
| 122                  | Frequency of Nucleobase ggta in flanking site | 0.19409207                |
| 200                  | Frequency of Nucleobase cacg in flanking site | 0.193887689               |
| 219                  | Frequency of Nucleobase tgat in flanking site | 0.192564257               |
| 232                  | Frequency of Nucleobase cagt in flanking site | 0.192201047               |
| 327                  | Frequency of Nucleobase tacc in flanking site | 0.191839866               |
| 258                  | Frequency of Nucleobase gctt in flanking site | 0.19121014                |
| 318                  | Frequency of Nucleobase gttc in flanking site | 0.190344152               |
| 344                  | number of bulge with length 1                 | 0.18854486                |
| 291                  | Frequency of Nucleobase tcac in flanking site | 0.187274897               |
| 220                  | Frequency of Nucleobase cgat in flanking site | 0.184025254               |
| 307                  | Frequency of Nucleobase tcgc in flanking site | 0.183986871               |
| 241                  | Frequency of Nucleobase acgt in flanking site | 0.182904126               |
| 158                  | Frequency of Nucleobase gtag in flanking site | 0.18270943                |
| 312                  | Frequency of Nucleobase catc in flanking site | 0.182423671               |
| 279                  | Frequency of Nucleobase taac in flanking site | 0.182254663               |
| 236                  | Frequency of Nucleobase cggt in flanking site | 0.181003598               |
| 240                  | Frequency of Nucleobase ctgt in flanking site | 0.179609896               |
| 278                  | Frequency of Nucleobase gaac in flanking site | 0.179243982               |
| 160                  | Frequency of Nucleobase ctag in flanking site | 0.178770331               |
| 118                  | Frequency of Nucleobase gata in flanking site | 0.178585827               |
| 325                  | Frequency of Nucleobase aacc in flanking site | 0.178294791               |
| 264                  | Frequency of Nucleobase cact in flanking site | 0.176386702               |
| 104                  | Frequency of Nucleobase caga in flanking site | 0.174938885               |
| 34                   | Frequency of Nucleobase gca in flanking site  | 0.174840383               |
| 189                  | Frequency of Nucleobase attg in flanking site | 0.17318187                |
| 309                  | Frequency of Nucleobase aatc in flanking site | 0.17233501                |
| 112                  | Frequency of Nucleobase ctga in flanking site | 0.17200947                |
| 333                  | Frequency of Nucleobase atcc in flanking site | 0.171478909               |
| 192                  | Frequency of Nucleobase cttg in flanking site | 0.170607584               |
| 269                  | Frequency of Nucleobase atct in flanking site | 0.170402576               |
| 176                  | Frequency of Nucleobase ctgg in flanking site | 0.170365203               |

*Continued on next page*

Table 1 – *Continued from previous page*

| <b>Feature Index</b> | <b>Feature Description</b>                    | <b>1– Laplacian Score</b> |
|----------------------|-----------------------------------------------|---------------------------|
| 280                  | Frequency of Nucleobase caac in flanking site | 0.169628907               |
| 354                  | number of Hairpin with length 1               | 0.168126239               |
| 224                  | Frequency of Nucleobase ctat in flanking site | 0.166755836               |
| 173                  | Frequency of Nucleobase atgg in flanking site | 0.166318577               |
| 199                  | Frequency of Nucleobase tacg in flanking site | 0.166145772               |
| 273                  | Frequency of Nucleobase acct in flanking site | 0.165596062               |
| 202                  | Frequency of Nucleobase ggcg in flanking site | 0.16481325                |
| 268                  | Frequency of Nucleobase cgct in flanking site | 0.163347004               |
| 297                  | Frequency of Nucleobase aggc in flanking site | 0.162162309               |
| 301                  | Frequency of Nucleobase atgc in flanking site | 0.160959048               |
| 283                  | Frequency of Nucleobase tgac in flanking site | 0.16083641                |
| 322                  | Frequency of Nucleobase gctc in flanking site | 0.160206524               |
| 193                  | Frequency of Nucleobase actg in flanking site | 0.159636645               |
| 124                  | Frequency of Nucleobase cgta in flanking site | 0.158191639               |
| 195                  | Frequency of Nucleobase tctg in flanking site | 0.157843538               |
| 167                  | Frequency of Nucleobase tagg in flanking site | 0.157377616               |
| 184                  | Frequency of Nucleobase catg in flanking site | 0.155519503               |
| 274                  | Frequency of Nucleobase gcct in flanking site | 0.154853013               |
| 205                  | Frequency of Nucleobase atcg in flanking site | 0.152687027               |
| 182                  | Frequency of Nucleobase gatg in flanking site | 0.152261649               |
| 203                  | Frequency of Nucleobase tgcg in flanking site | 0.152257951               |
| 267                  | Frequency of Nucleobase tgct in flanking site | 0.151714488               |
| 286                  | Frequency of Nucleobase gtac in flanking site | 0.151567604               |
| 331                  | Frequency of Nucleobase tgcc in flanking site | 0.148856657               |
| 306                  | Frequency of Nucleobase gcgc in flanking site | 0.147652792               |
| 226                  | Frequency of Nucleobase gcat in flanking site | 0.146820638               |
| 288                  | Frequency of Nucleobase ctac in flanking site | 0.146793845               |
| 242                  | Frequency of Nucleobase gcgt in flanking site | 0.14612174                |
| 357                  | number of Hairpin with length 4               | 0.142580593               |
| 129                  | Frequency of Nucleobase acta in flanking site | 0.142135549               |
| 290                  | Frequency of Nucleobase gcac in flanking site | 0.141630904               |
| 356                  | number of Hairpin with length 3               | 0.138832052               |
| 128                  | Frequency of Nucleobase ctta in flanking site | 0.135602996               |
| 216                  | Frequency of Nucleobase caat in flanking site | 0.134179706               |
| 140                  | Frequency of Nucleobase cgca in flanking site | 0.133749974               |
| 310                  | Frequency of Nucleobase gatc in flanking site | 0.132684341               |
| 132                  | Frequency of Nucleobase ccta in flanking site | 0.132482176               |
| 304                  | Frequency of Nucleobase ctgc in flanking site | 0.132389078               |

*Continued on next page*

Table 1 – *Continued from previous page*

| <b>Feature Index</b> | <b>Feature Description</b>                     | <b>1– Laplacian Score</b> |
|----------------------|------------------------------------------------|---------------------------|
| 360                  | number of Hairpin with length 7                | 0.131450831               |
| 146                  | Frequency of Nucleobase gccca in flanking site | 0.128872297               |
| 302                  | Frequency of Nucleobase gtgc in flanking site  | 0.128592397               |
| 311                  | Frequency of Nucleobase tadc in flanking site  | 0.127715436               |
| 293                  | Frequency of Nucleobase aagc in flanking site  | 0.126253173               |
| 359                  | number of Hairpin with length 6                | 0.123689359               |
| 369                  | number of Interior Loop with length 6          | 0.122951423               |
| 367                  | number of Interior Loop with length 4          | 0.117976655               |
| 305                  | Frequency of Nucleobase acgc in flanking site  | 0.11339999                |
| 144                  | Frequency of Nucleobase ctca in flanking site  | 0.112834133               |
| 347                  | number of bulge with length 4                  | 0.111954215               |
| 218                  | Frequency of Nucleobase ggat in flanking site  | 0.110246376               |
| 348                  | number of bulge with length 5                  | 0.106258054               |
| 358                  | number of Hairpin with length 5                | 0.105702489               |
| 266                  | Frequency of Nucleobase ggct in flanking site  | 0.104079532               |
| 137                  | Frequency of Nucleobase agca in flanking site  | 0.10096554                |
| 201                  | Frequency of Nucleobase agcg in flanking site  | 0.096112259               |
| 346                  | number of bulge with length 3                  | 0.092624579               |
| 366                  | number of Interior Loop with length 3          | 0.091690309               |
| 370                  | number of Interior Loop with length 7          | 0.086482095               |
| 345                  | number of bulge with length 2                  | 0.083600697               |
| 194                  | Frequency of Nucleobase gctg in flanking site  | 0.075261849               |
| 368                  | number of Interior Loop with length 5          | 0.074094624               |
| 355                  | number of Hairpin with length 2                | 0.061156788               |
| 350                  | number of bulge with length 7                  | 0.057720939               |
| 114                  | Frequency of Nucleobase gcga in flanking site  | 0.055005122               |
| 349                  | number of bulge with length 6                  | 0.052970667               |
| 138                  | Frequency of Nucleobase ggca in flanking site  | 0.040897574               |
| 162                  | Frequency of Nucleobase gcag in flanking site  | 0.033499254               |
| 299                  | Frequency of Nucleobase tggc in flanking site  | 0.026614581               |
| 364                  | number of Interior Loop with length 1          | 0                         |
